# Supplementary material
Source: PubMed Central journal article supplement (PMC5018156)

Immunoblots Fig. 1a

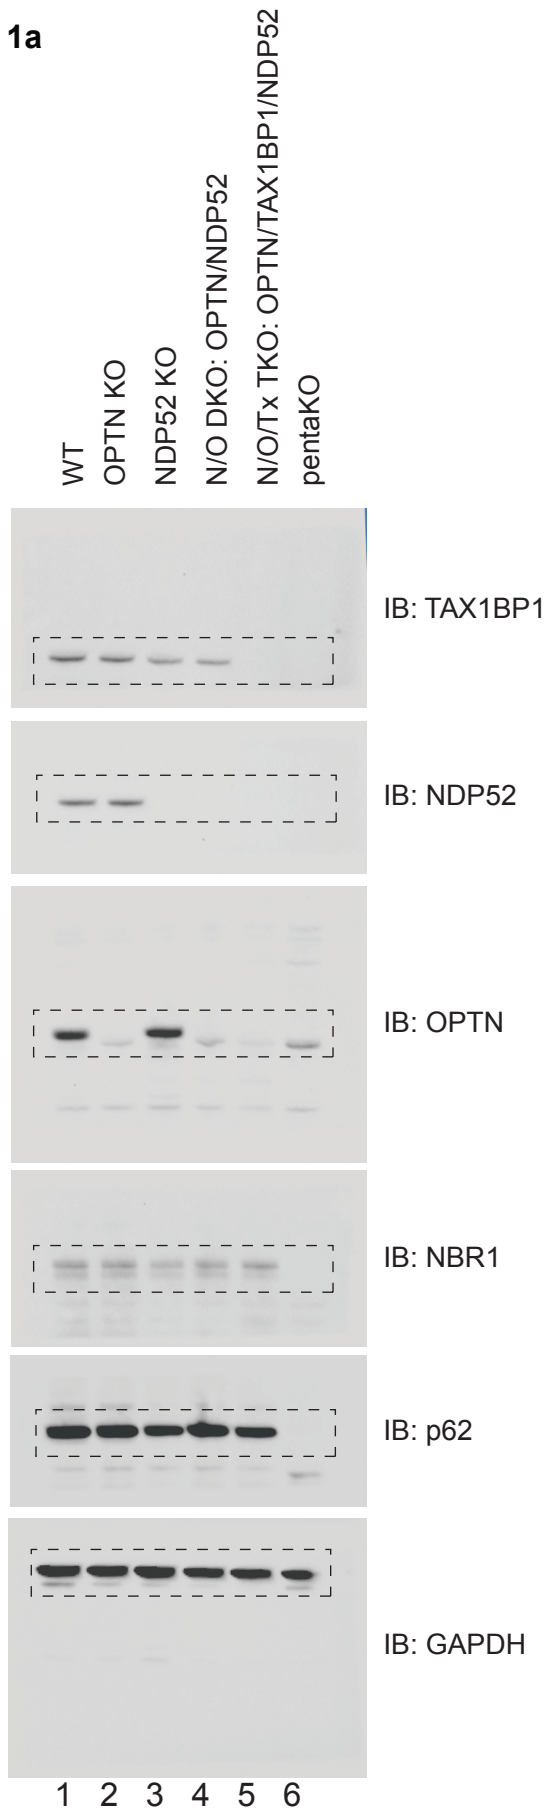

### Immunoblots Fig. 1b

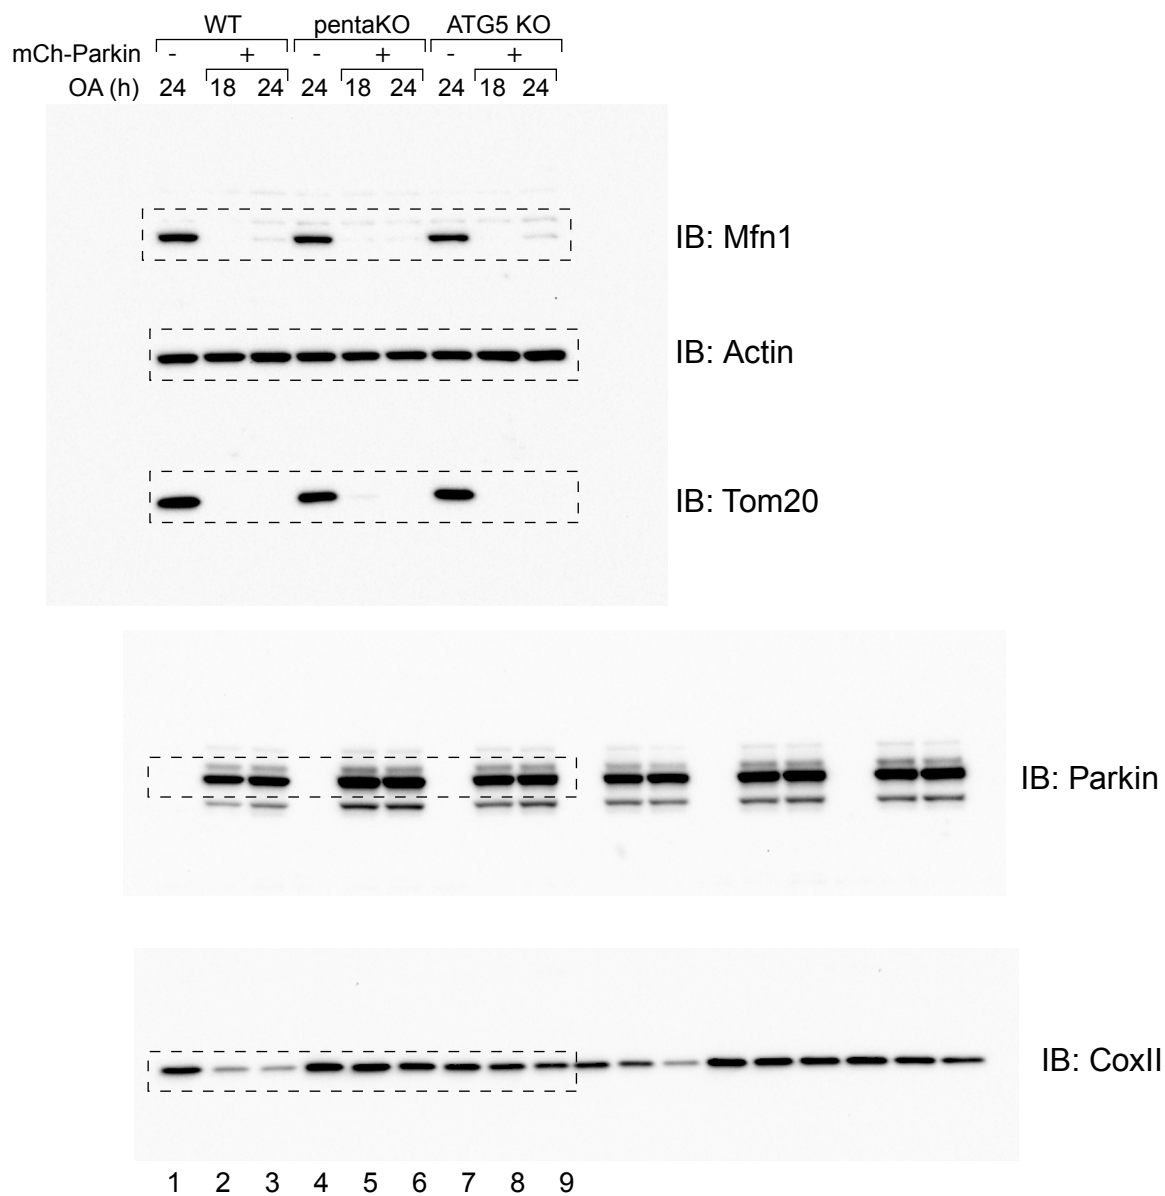



**Immunoblots Fig. 1f**

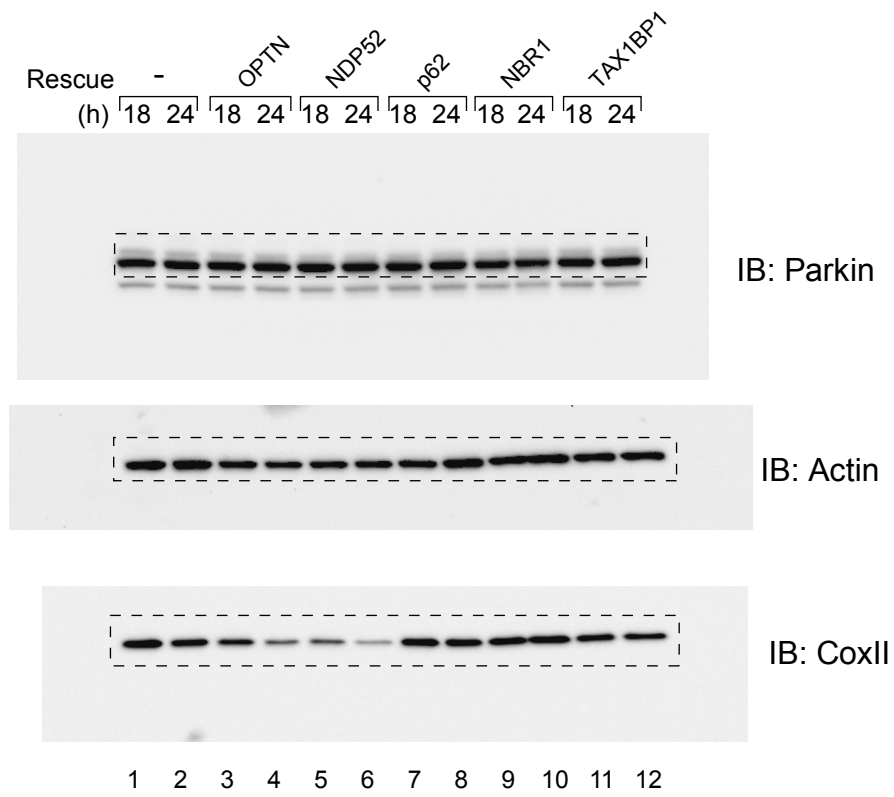

Immunoblots Fig. 2c

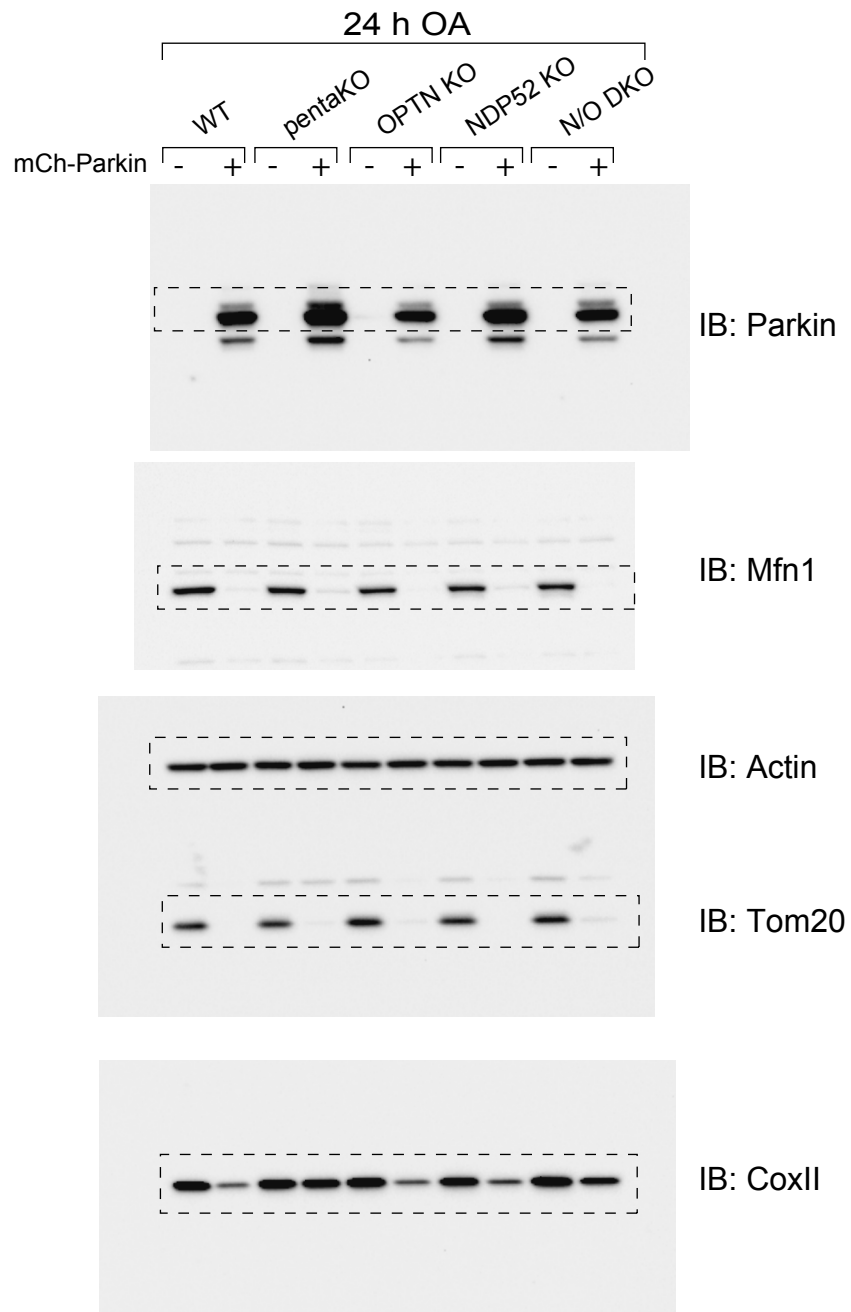

# Immunoblots Figure 2i

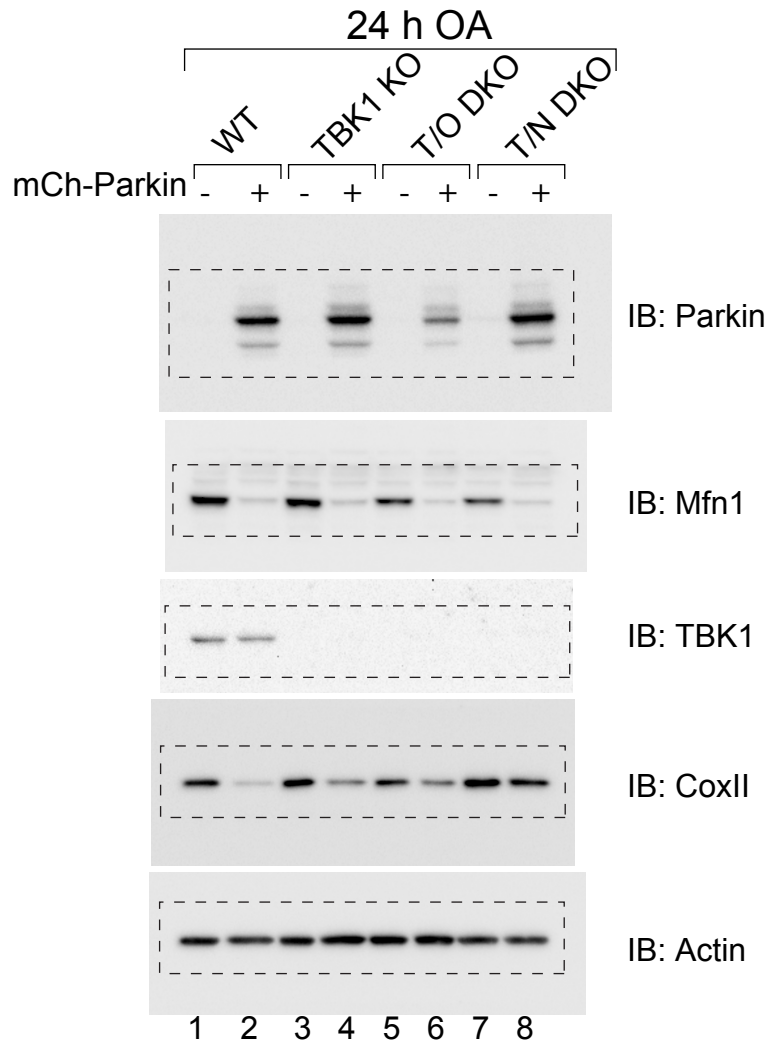

Immunoblots Fig. 4d

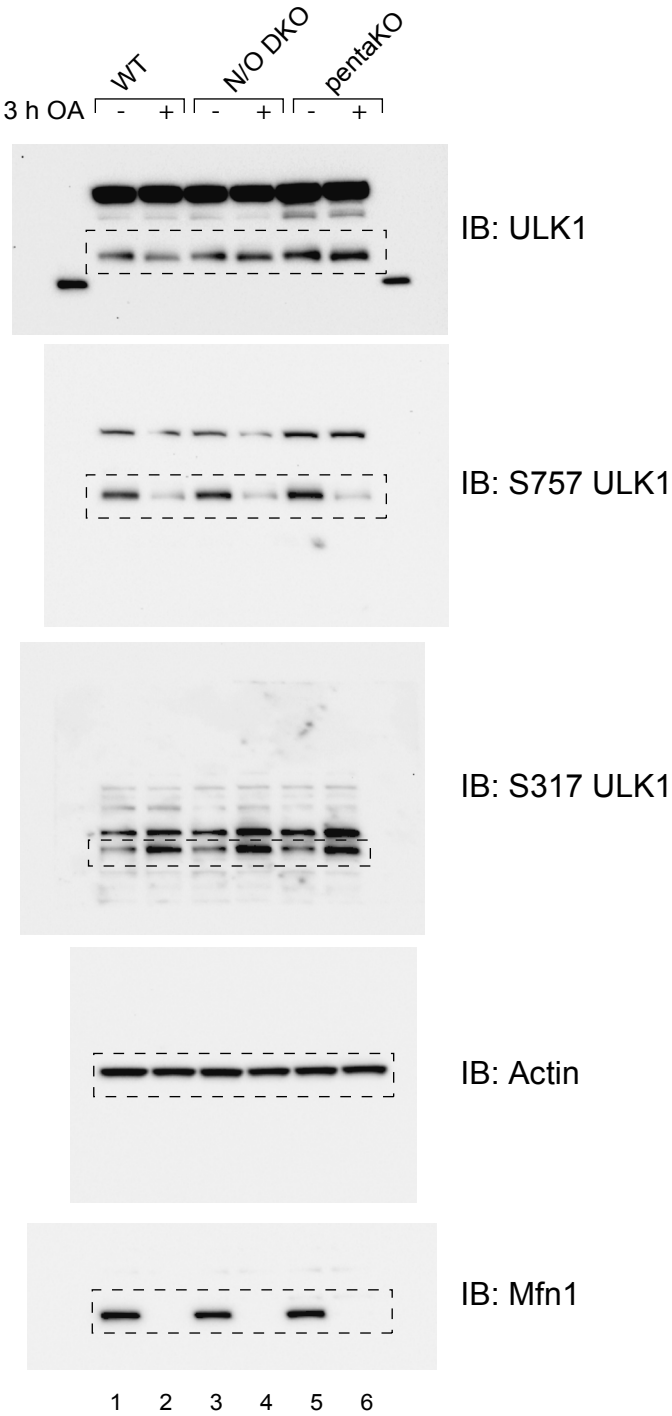

Immunoblots Extended Data Fig. 1a

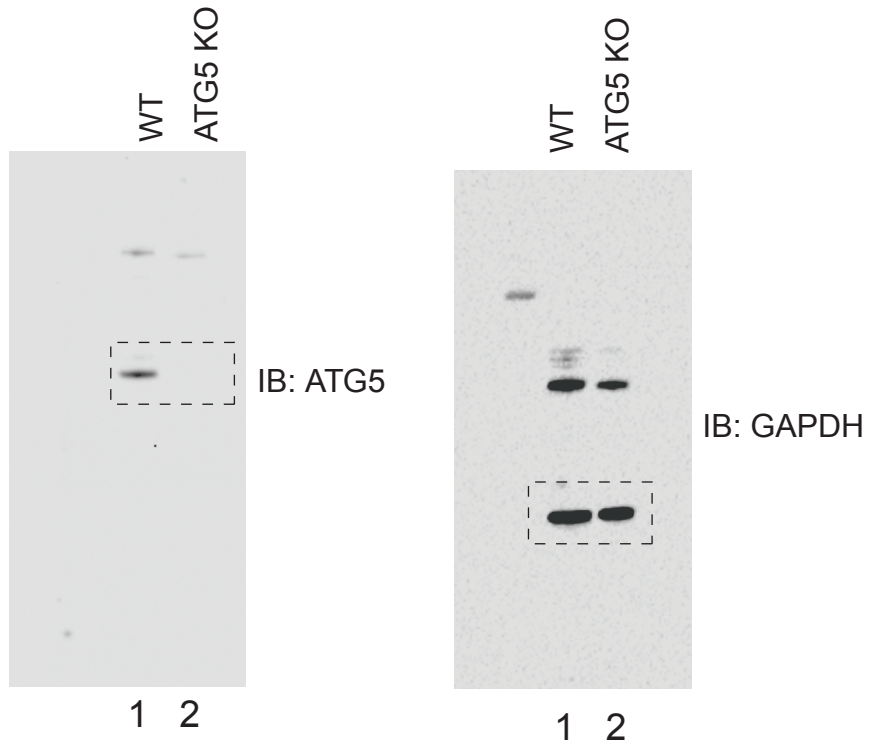

# Immunoblots Extended Data Fig. 1c

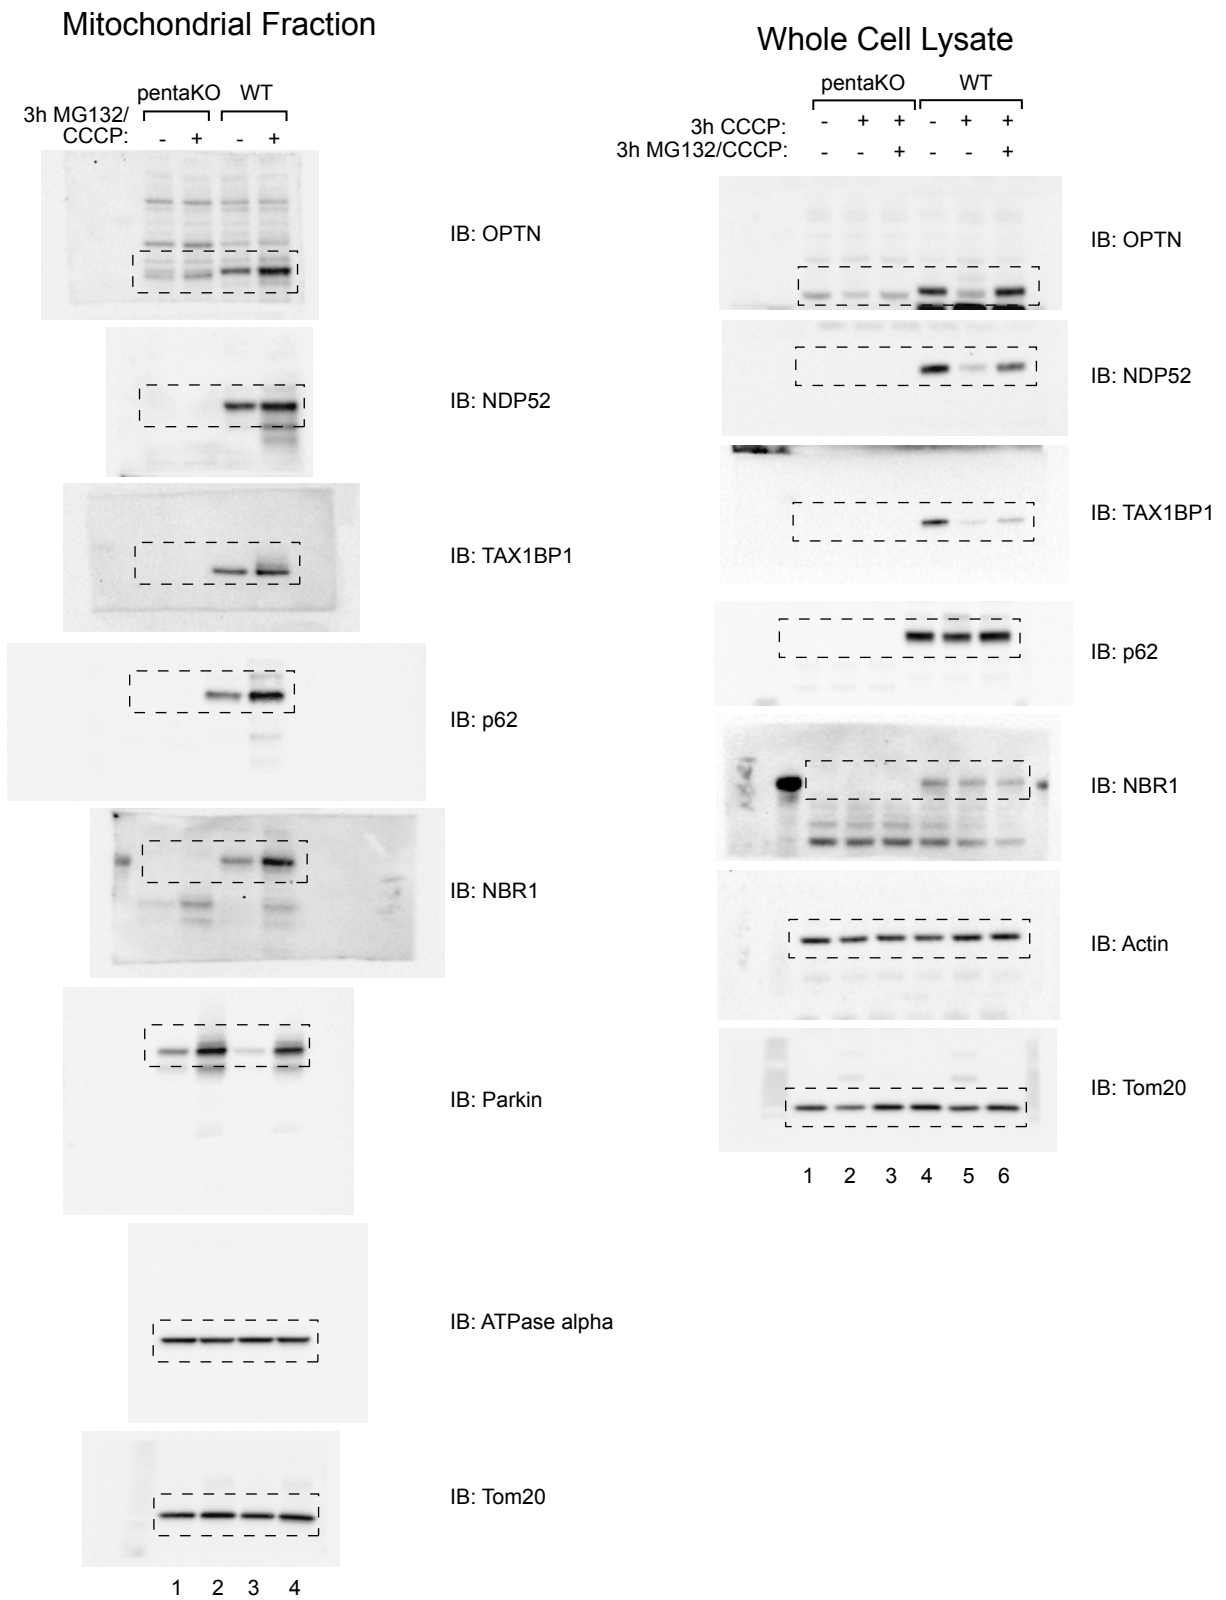

### Immunoblots Extended Data Fig. 1d

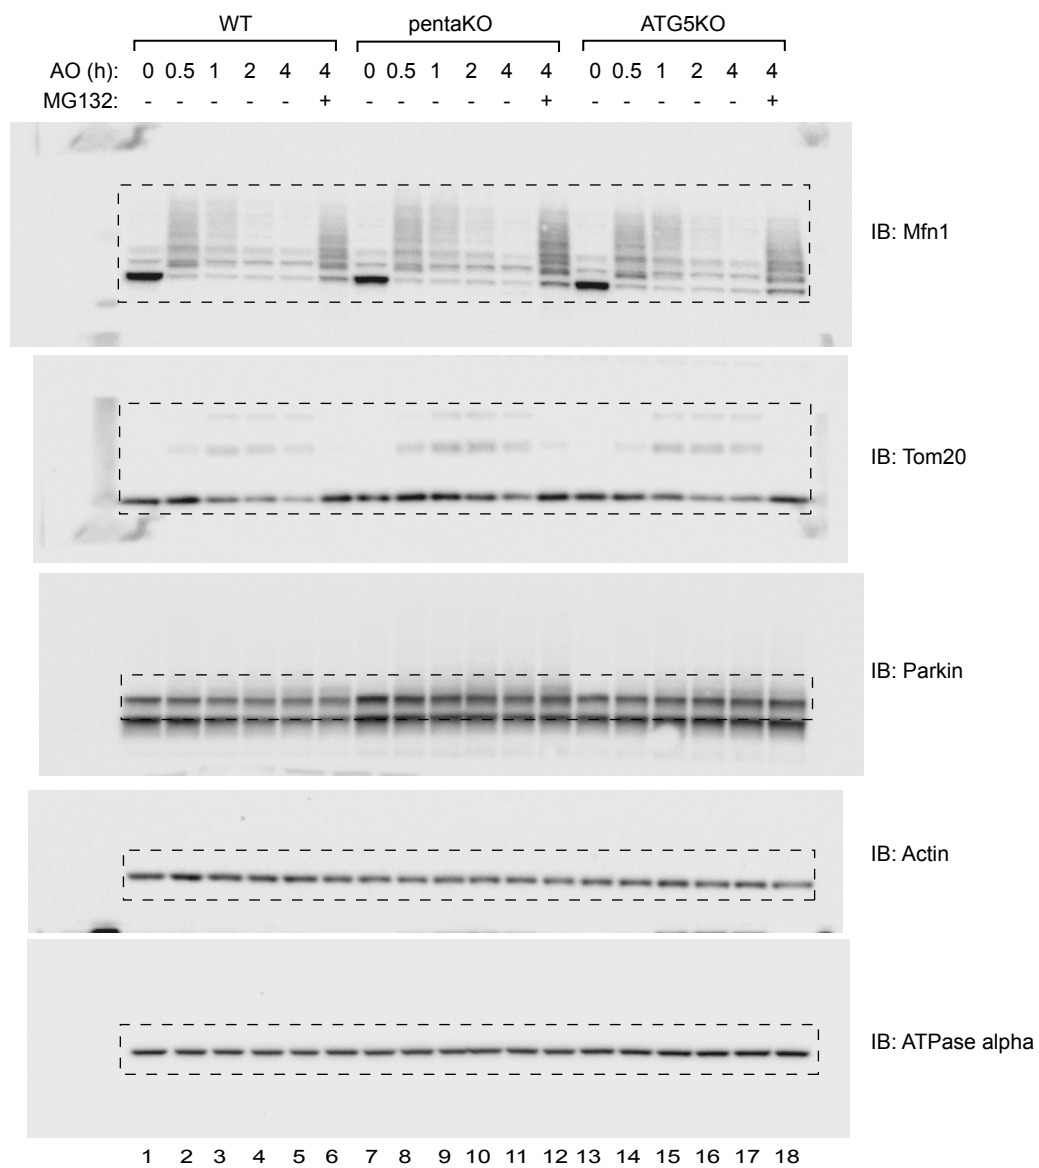

**Immunoblots Extended Data Fig. 1e**

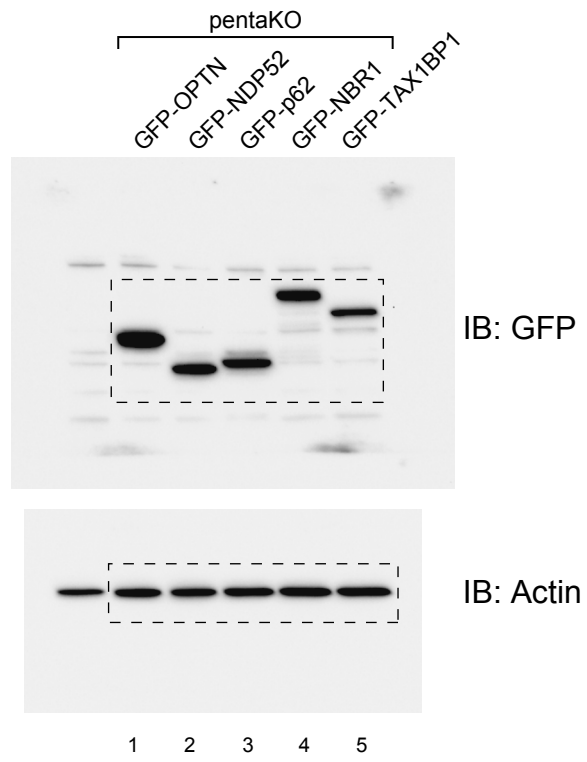



Immunoblots Extended Data Fig. 1g

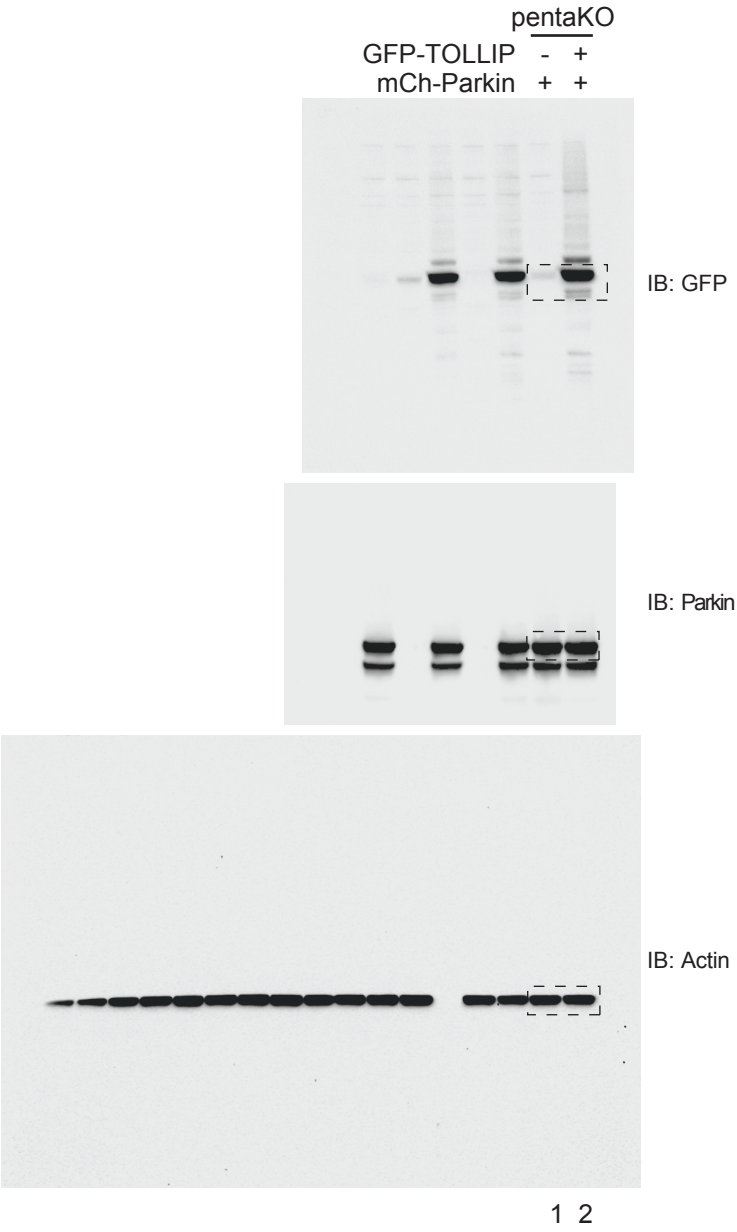

# Immunoblots Extended Data Fig. 1h

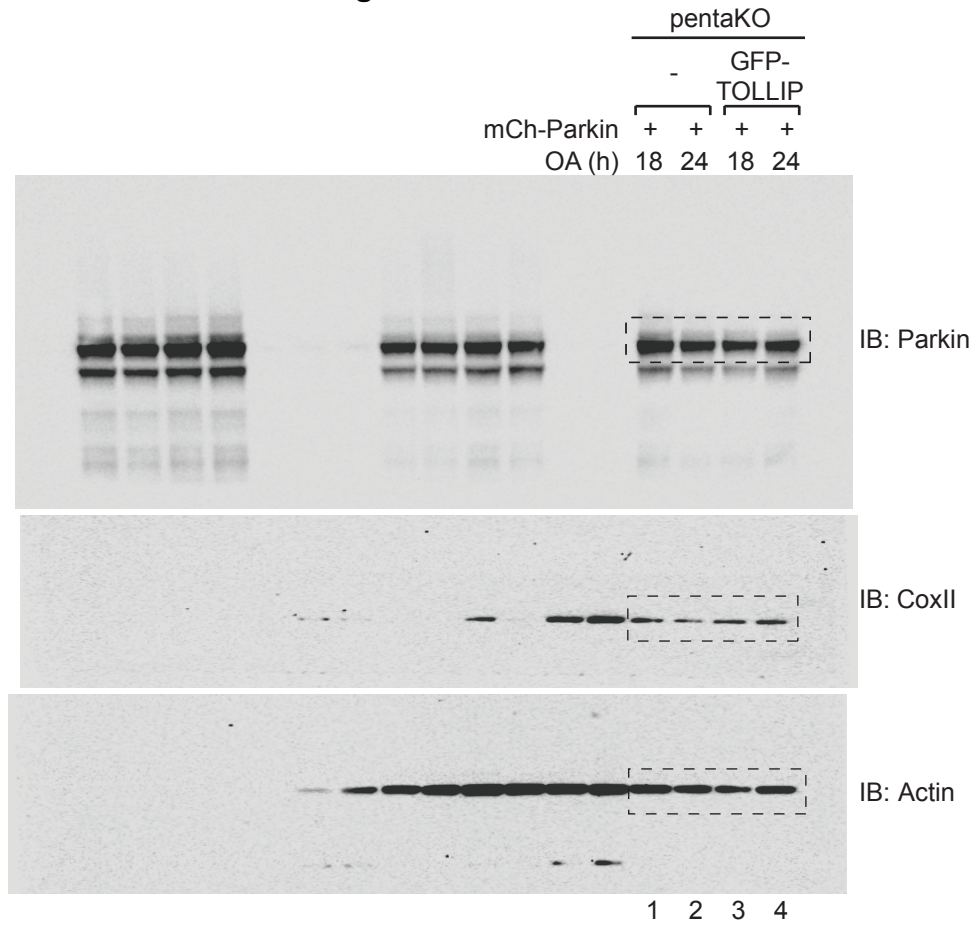

**Immunoblots Extended Data Fig. 2a**

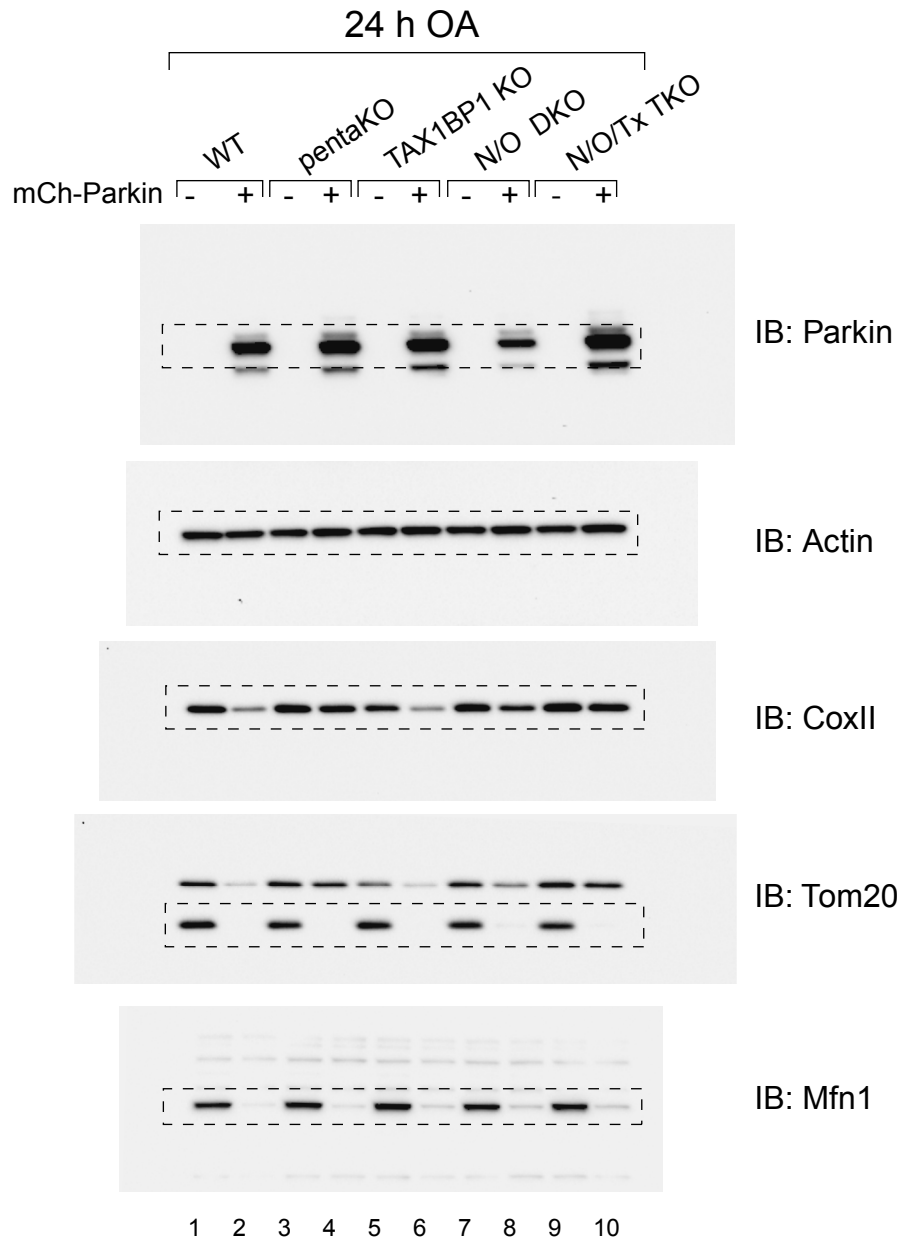



Immunoblots Extended Data Figure 2d

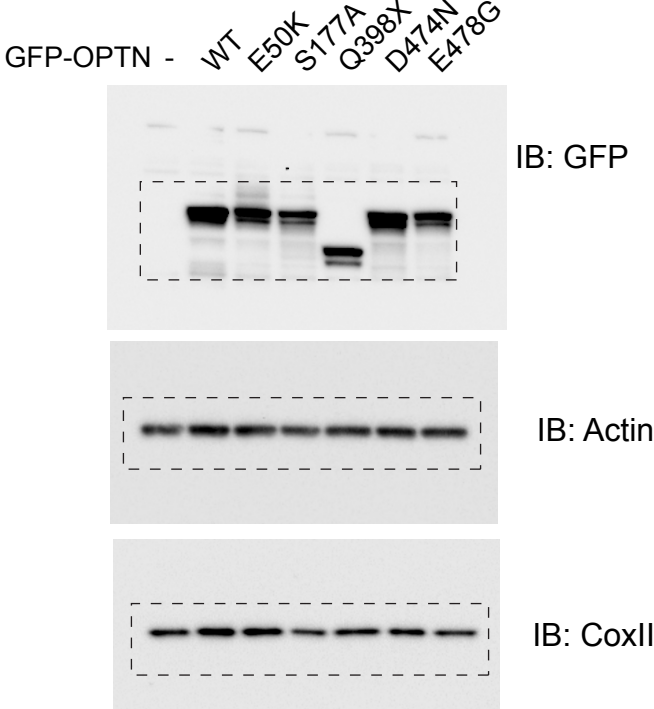

### Immunoblots Extended Data Fig. 2g

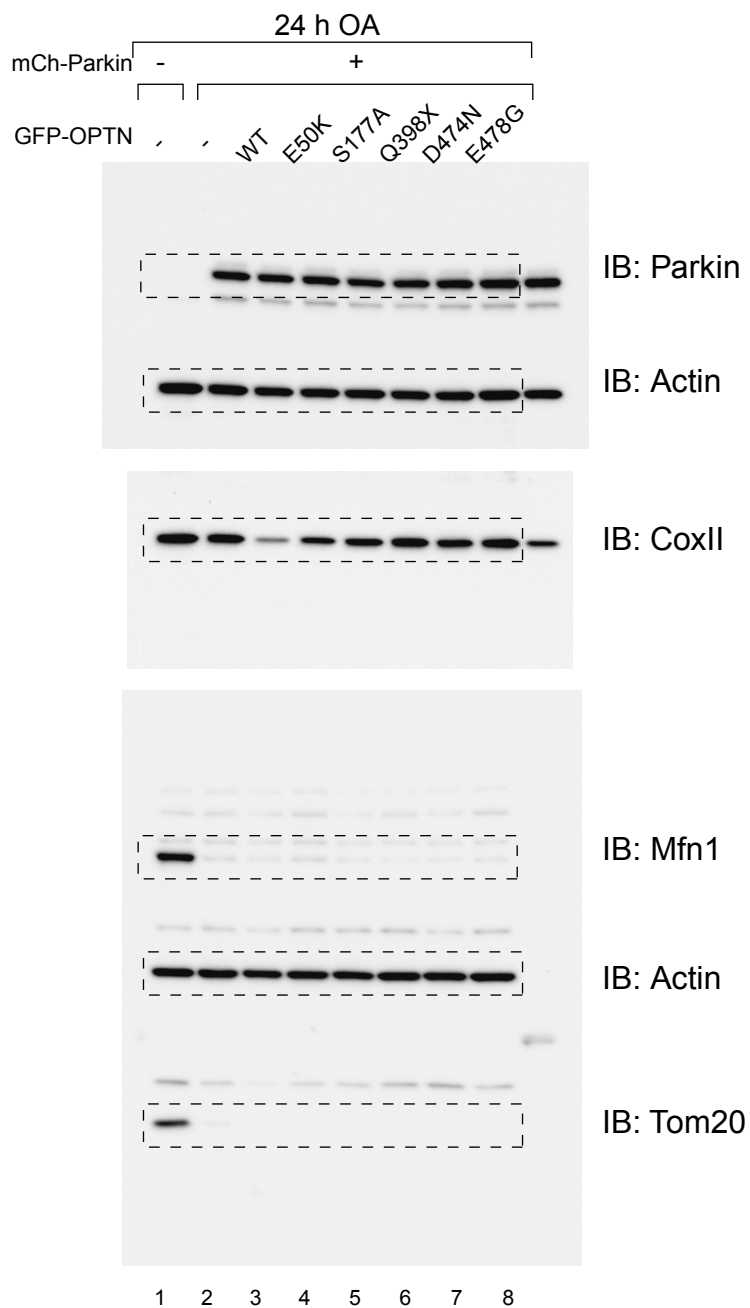

Immumoblots Extended Data Figure 2h

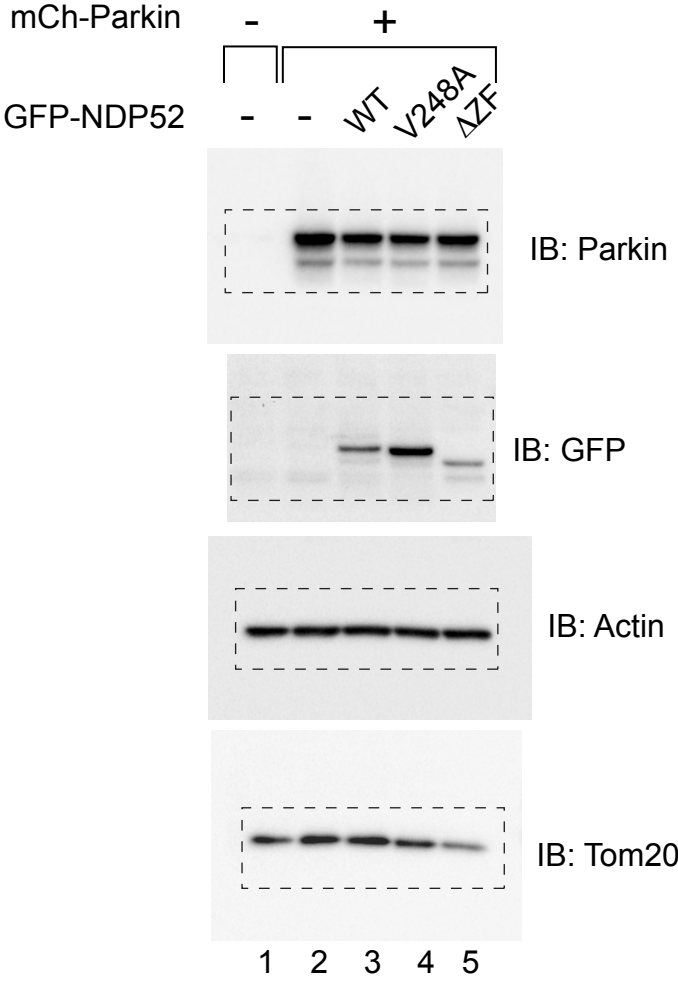

Immumoblots Extended Data Figure 2k

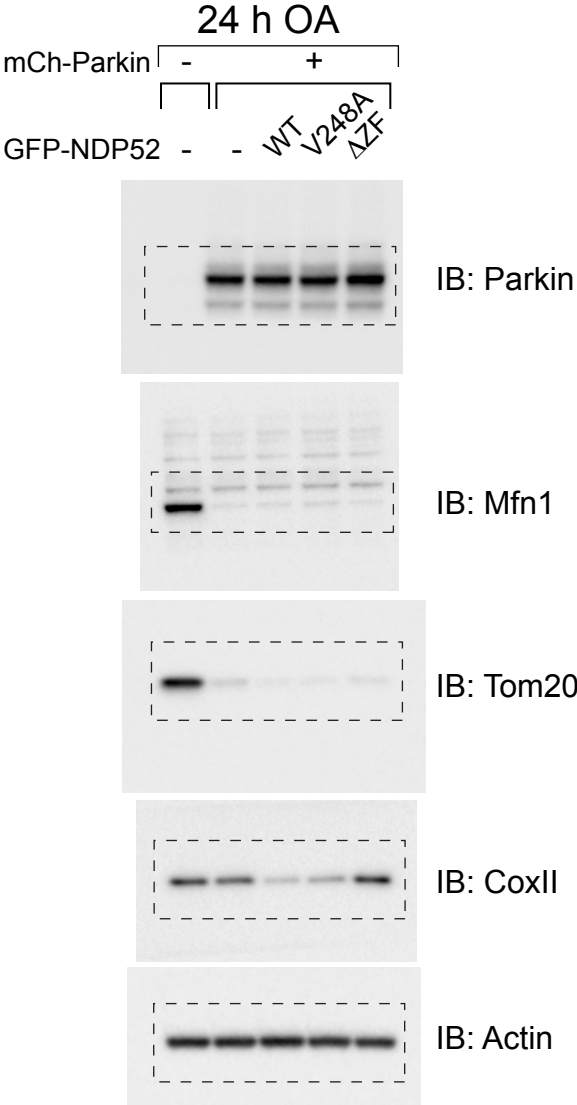



Immunoblots Extended Data Figure 3b

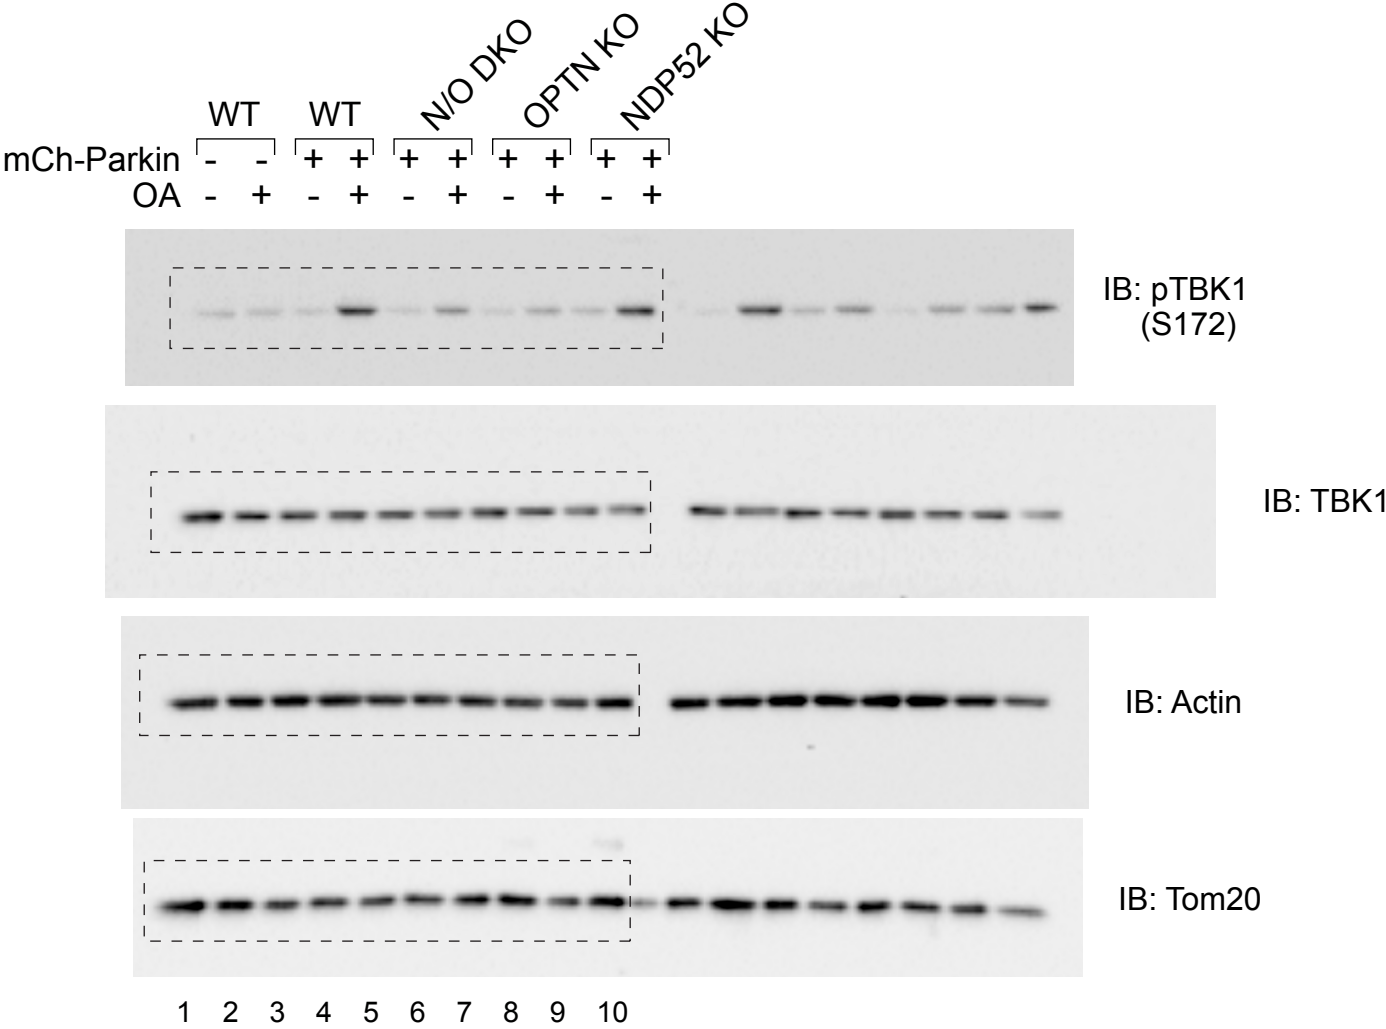

### Immunoblots Extended Data Figure 3c

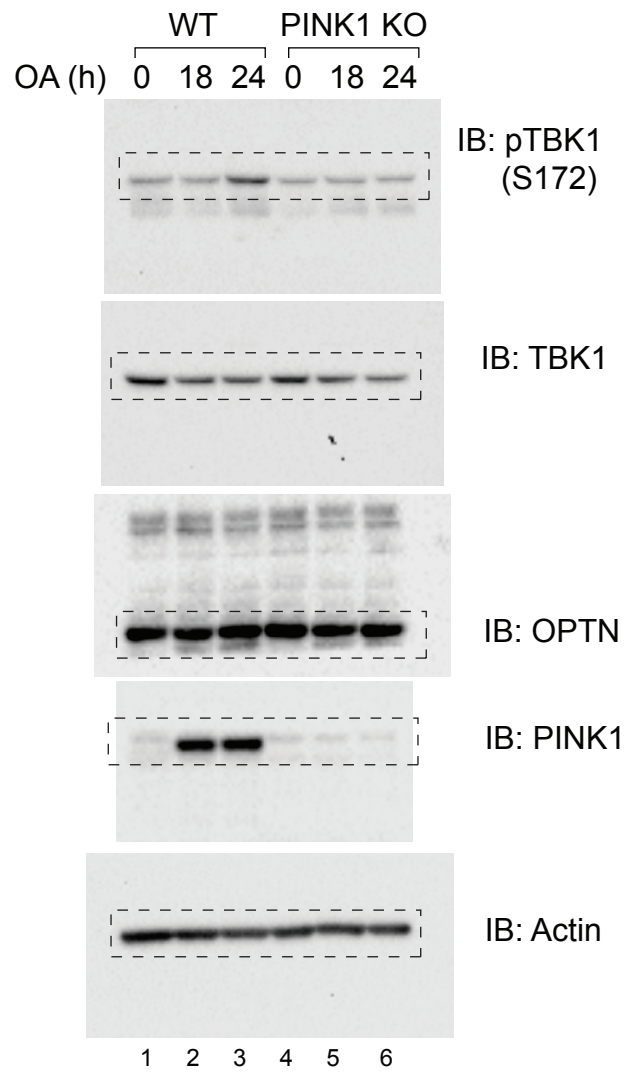

Immumoblots Extended Data Figure 3d

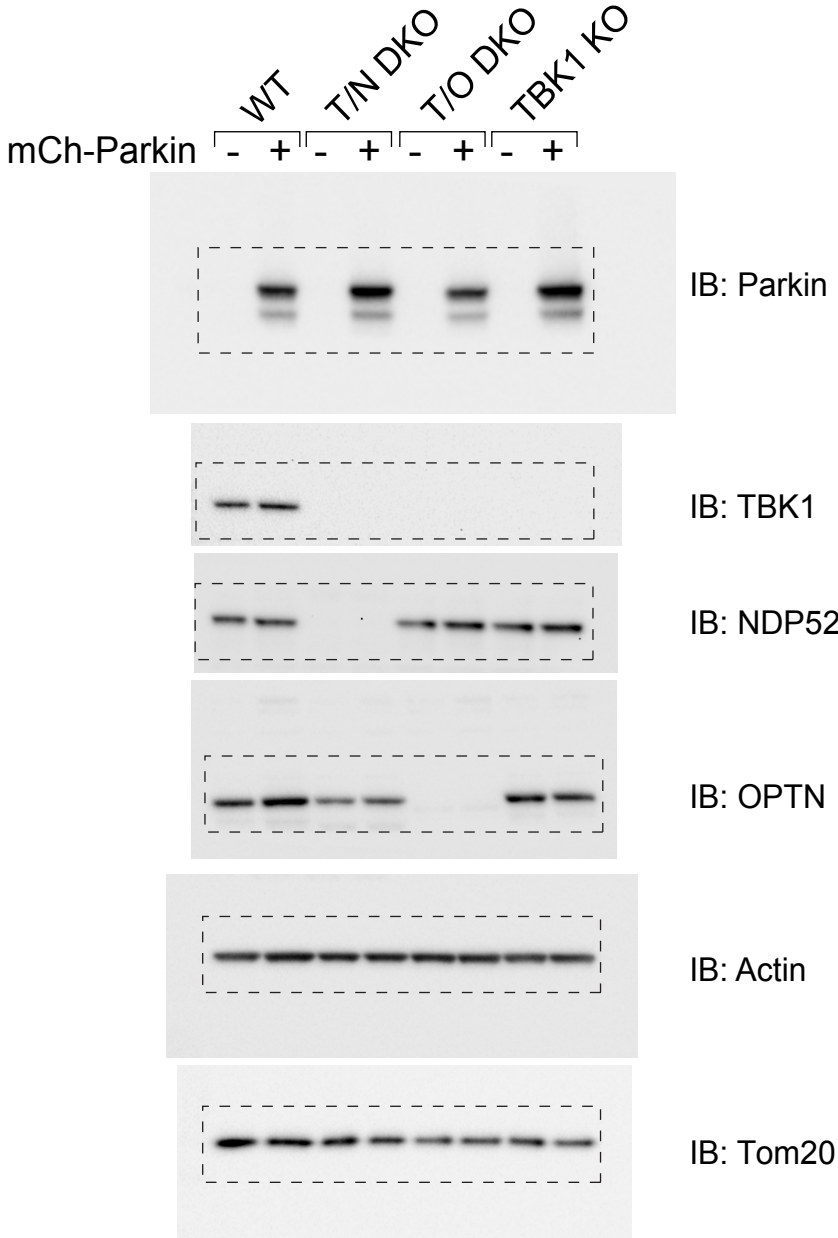

Immunoblots Extended Data Figure 3g, h

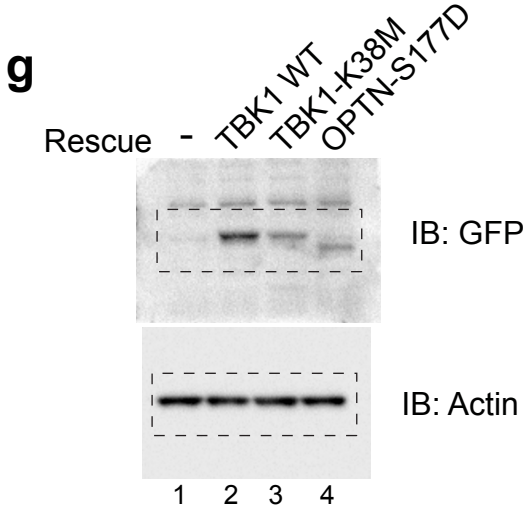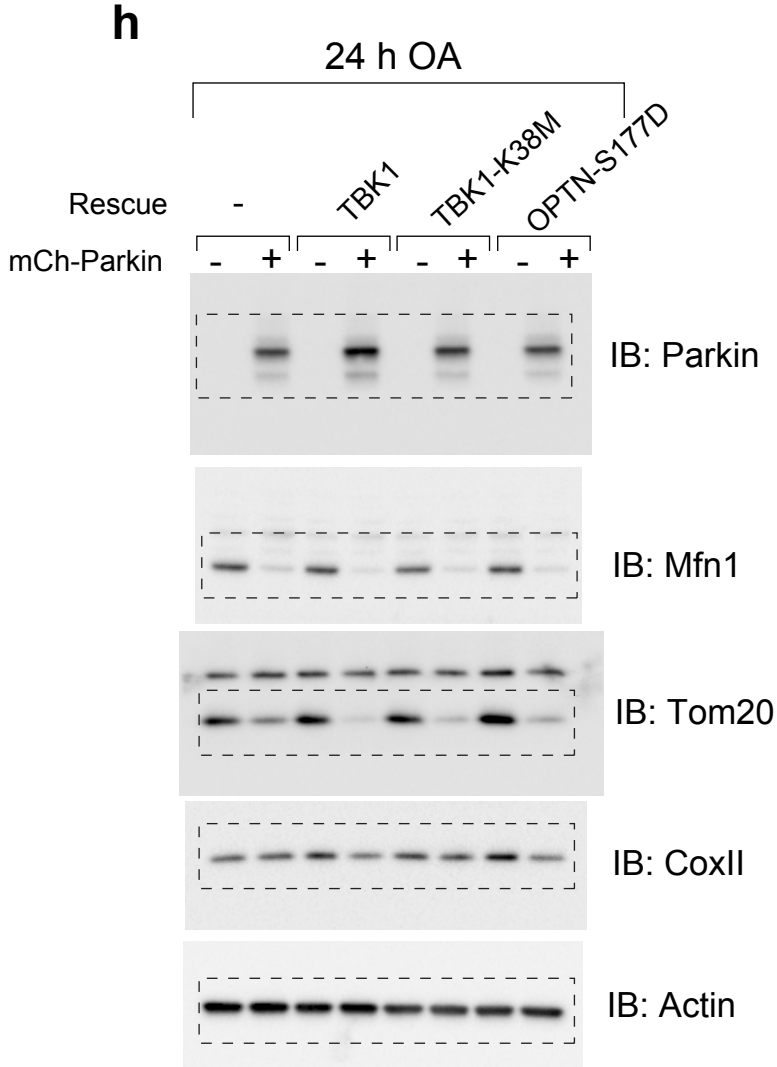

# Immunoblots Extended Data Fig. 4a

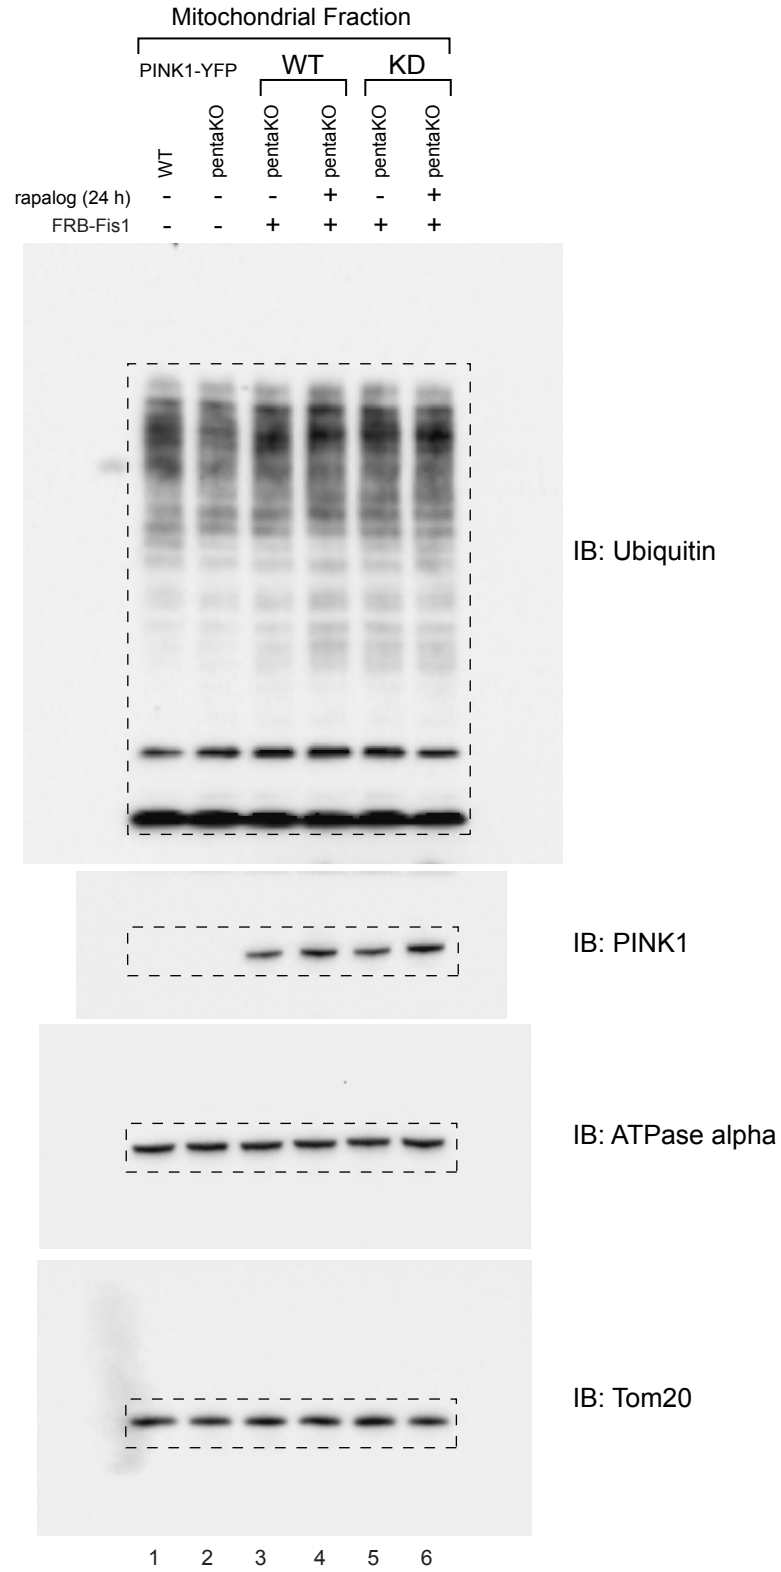

Immunoblots Extended Data Figure 5c,d,j

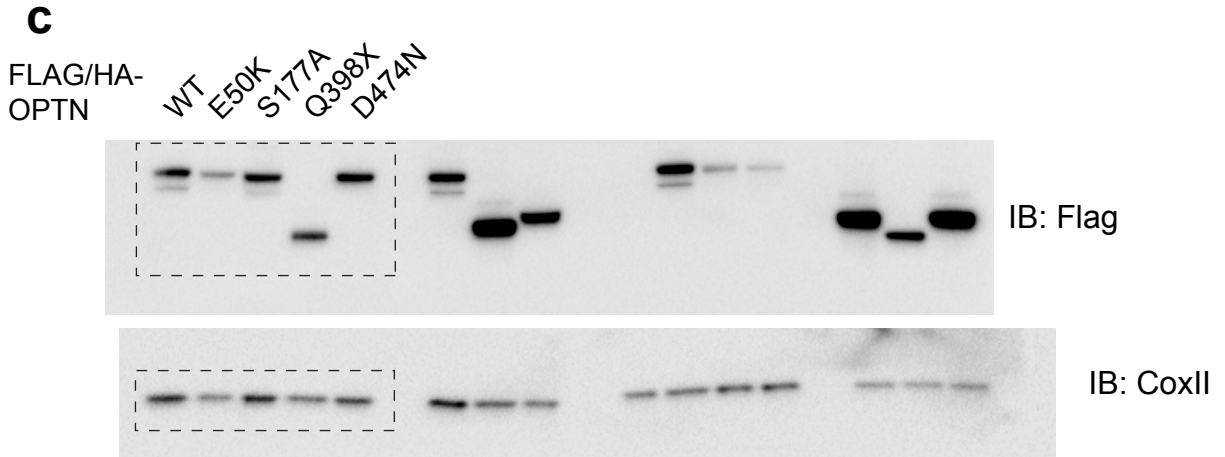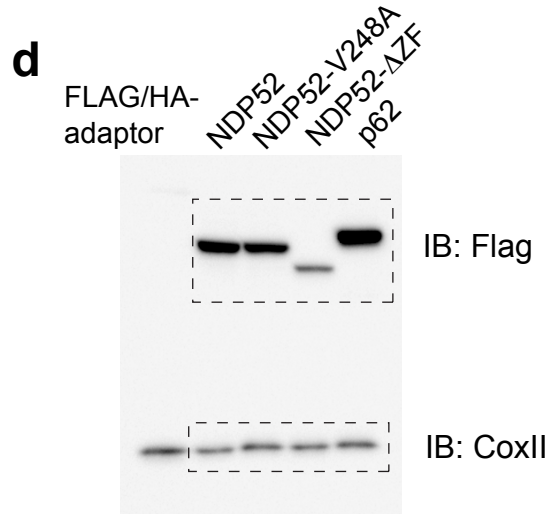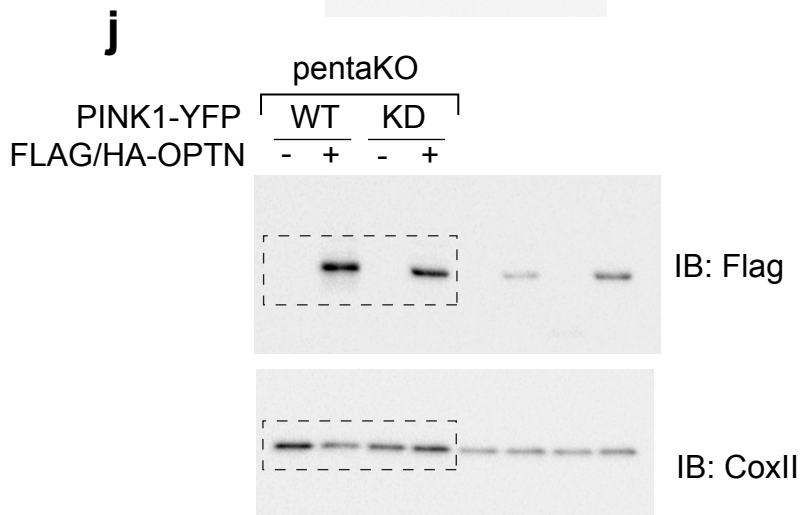

# Immunoblots Extended Data Fig. 7a

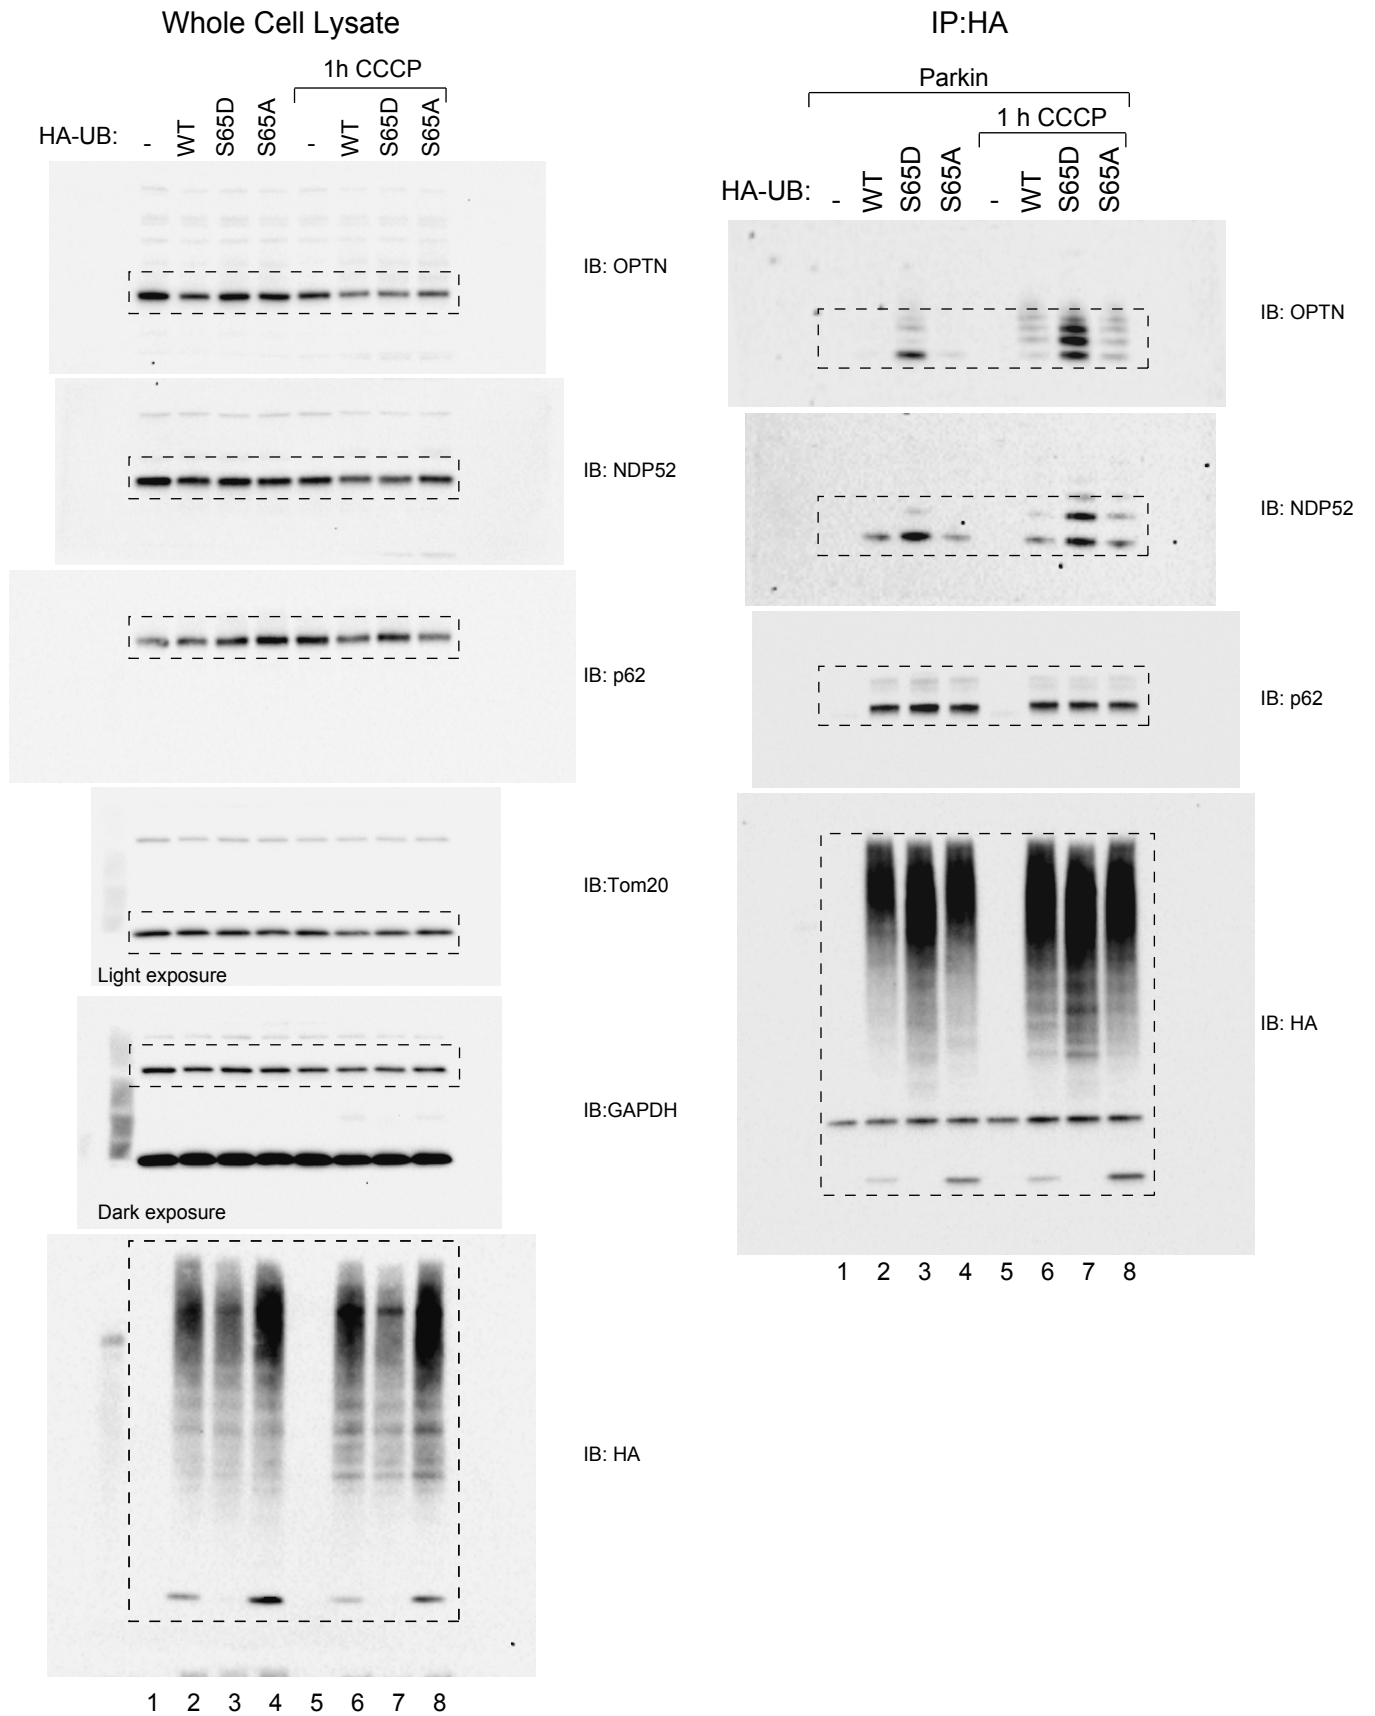

### Immunoblots Extended Data Fig. 7b

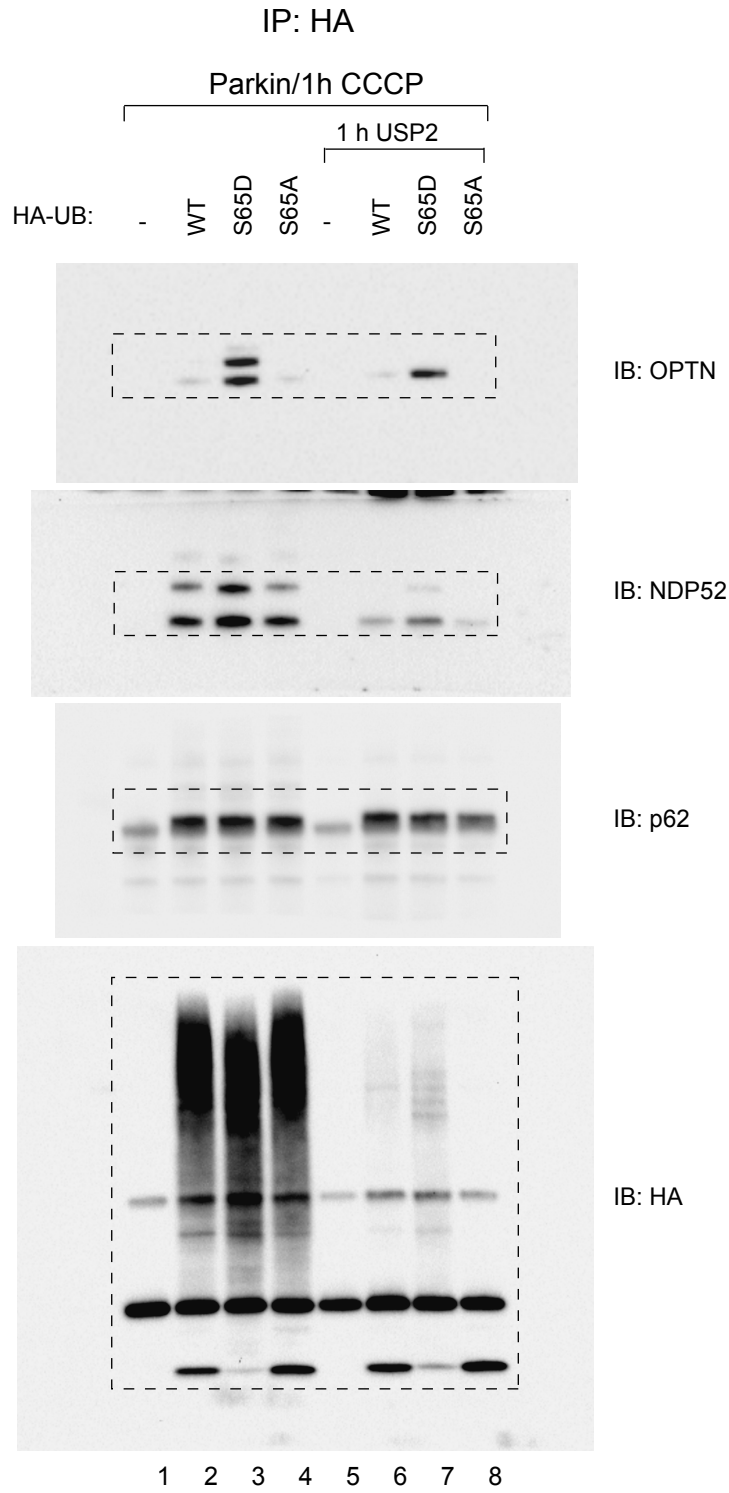



# Immunoblots Extended Data Fig. 7c,d

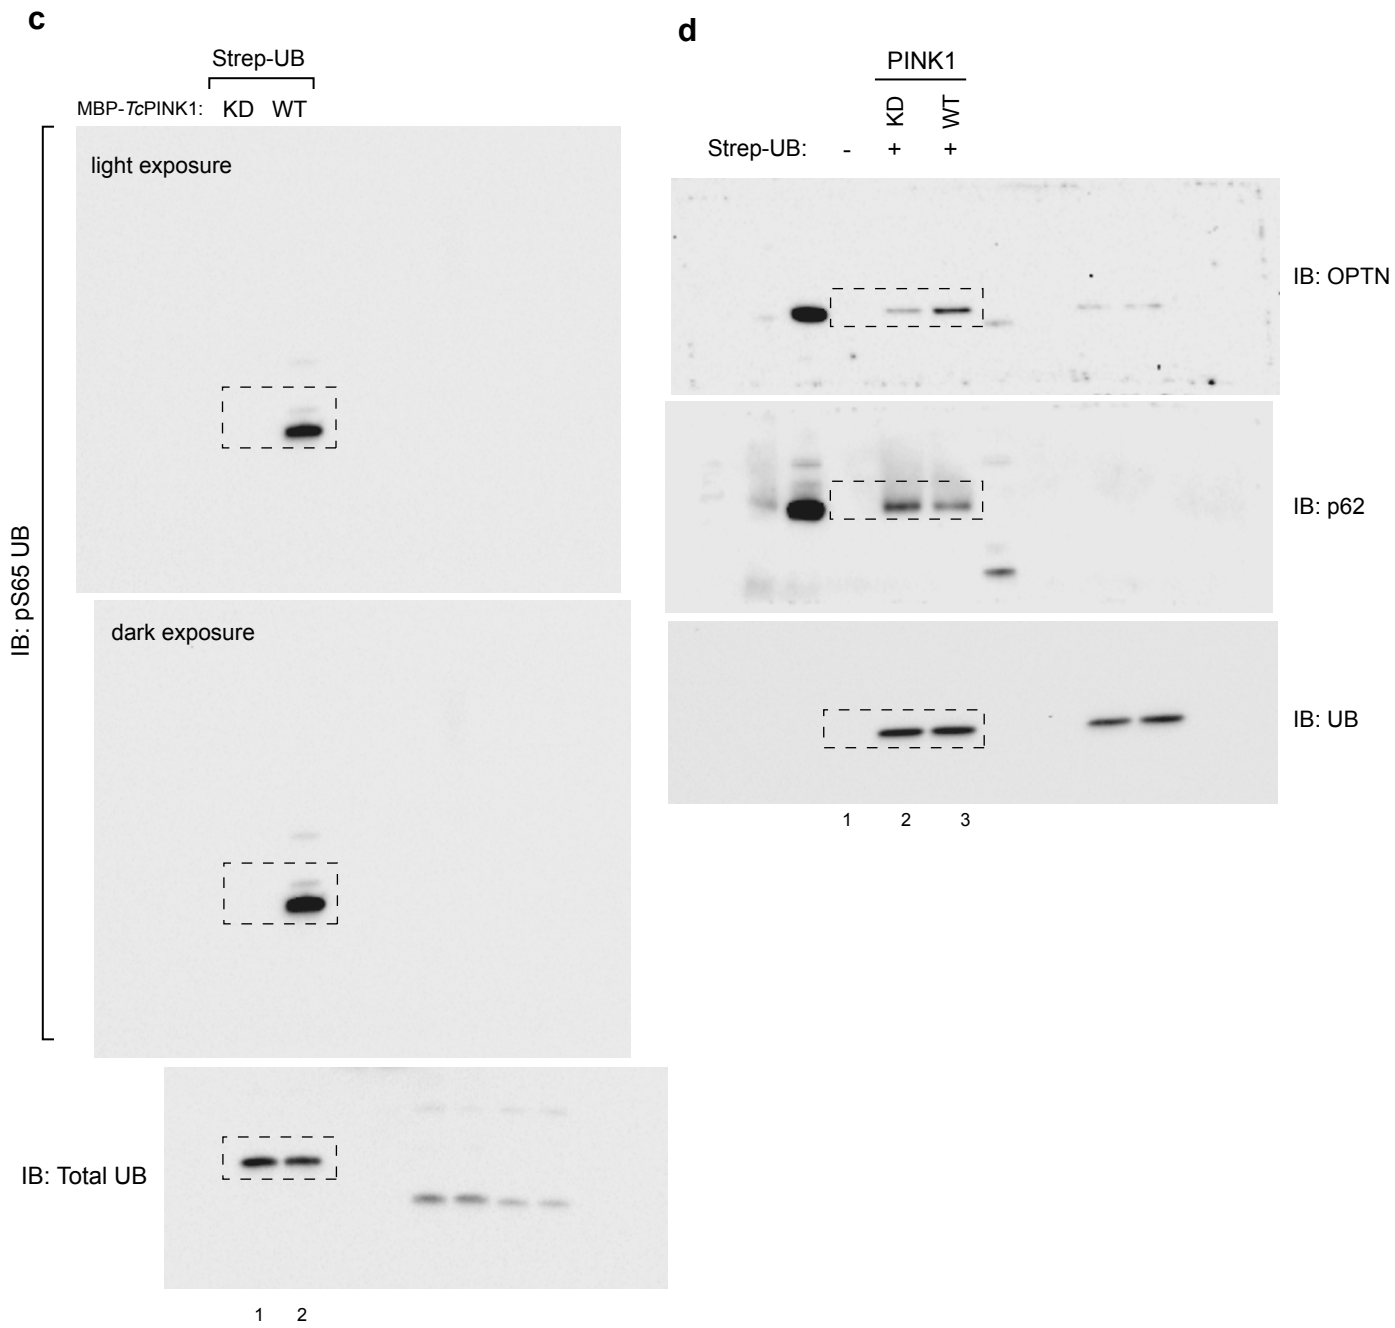

### Immunoblots Extended Data Fig. 8b

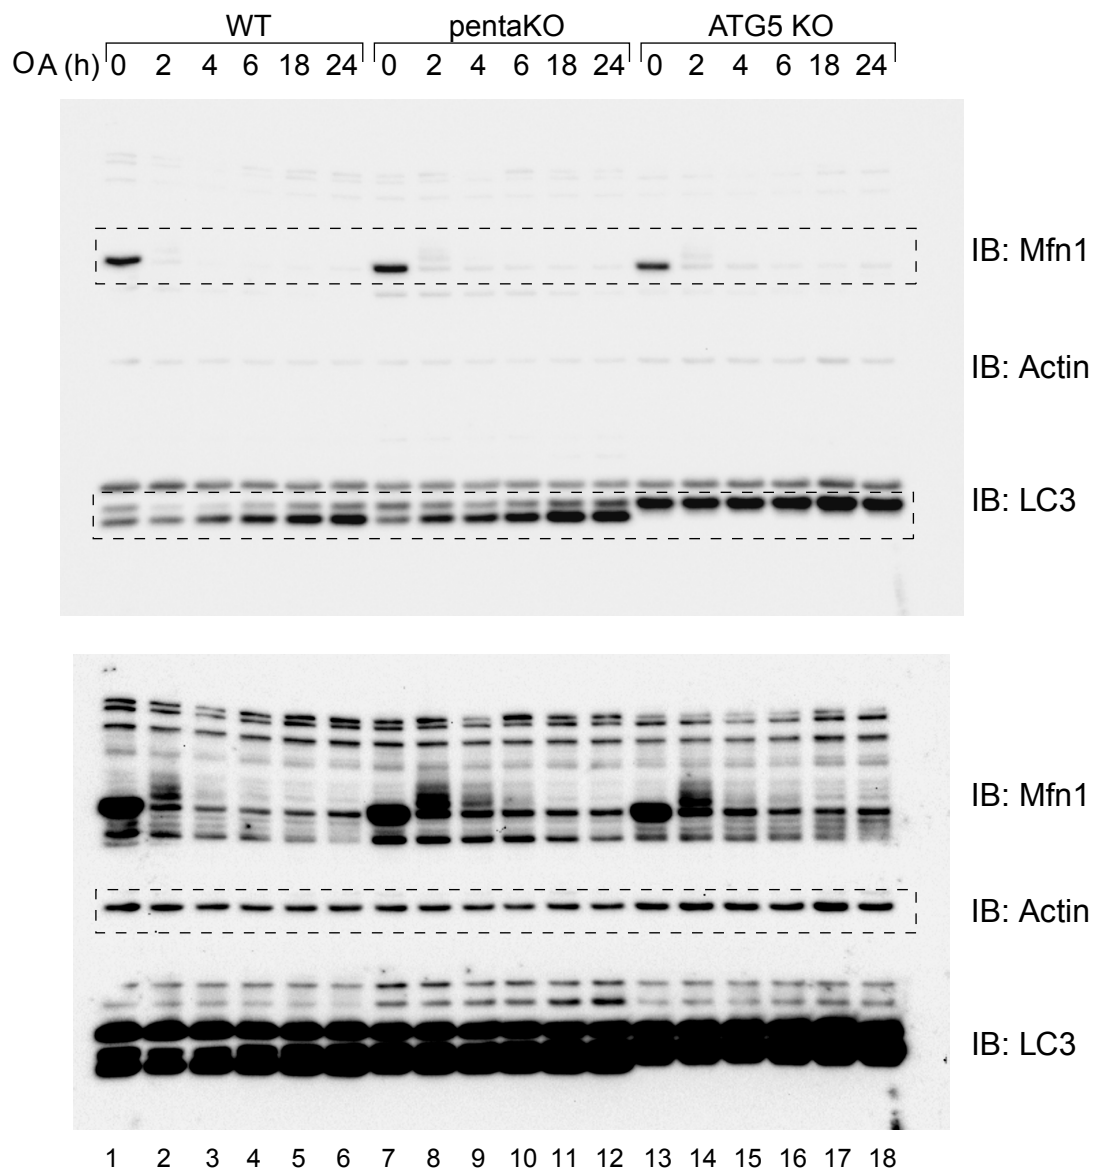

Immunoblots Extended Data Fig. 9d

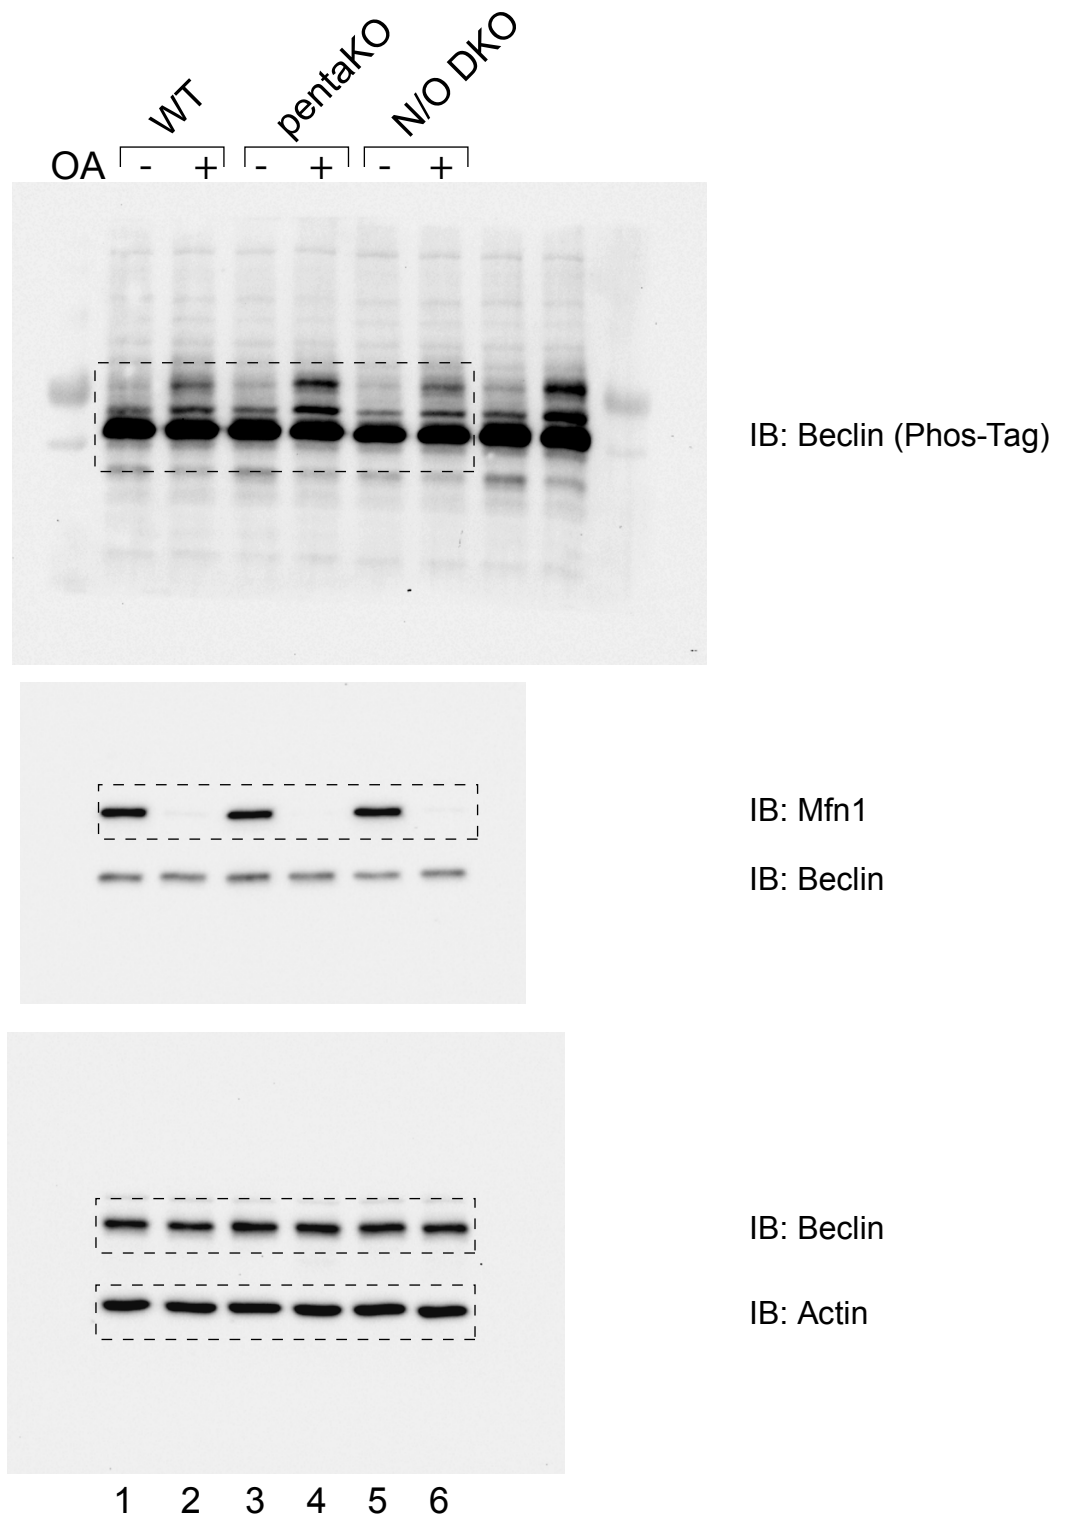

Supplement: NIHMS707551-supplement-2.pdf [file NIHMS707551-supplement-2.pdf]
